# Supplementary material for: A self-supported peapod-like mesoporous TiO2–C array with excellent anode performance in lithium-ion batteries
Source: Royal Society of Chemistry journal article supplement (doi:10.1039/c5nr01689d), 2015-01-01
Supplement: c5nr01689d1.pdf [file c5nr01689d1.pdf]

## Supporting Information:

### Self-supported Peapod-Like Mesoporous TiO<sub>2</sub>-C Array with Excellent Anode Performance in Lithium-Ion Batteries

*Liang Peng, Huijuan Zhang, Yuanjuan Bai, Yan Zhang, Yu Wang\**

The State Key Laboratory of Mechanical Transmissions and the School of Chemistry and Chemical Engineering,  
Chongqing University 174 Shazheng Street, Shapingba District, Chongqing City, P.R. China, 400044  
E-mail: wangy@cqu.edu.cn; prospectwy@gmail.com

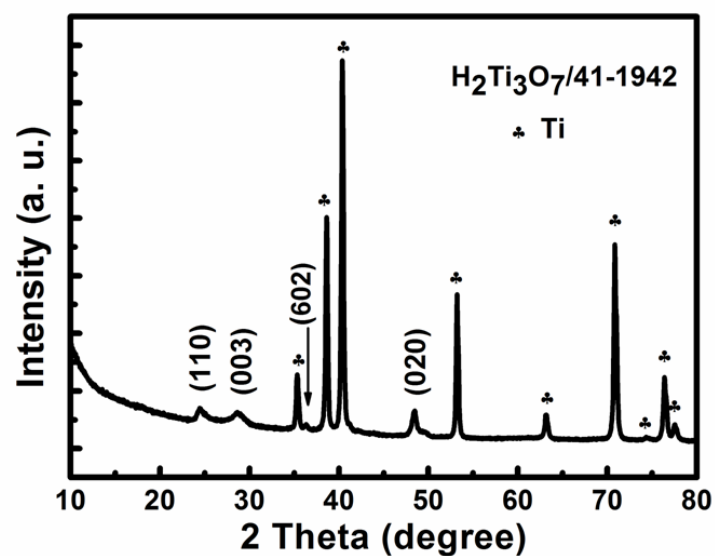

**Figure S1.** The XRD data to verify the obtained pure-phase H<sub>2</sub>Ti<sub>3</sub>O<sub>7</sub> nanotubes on Ti substrate.

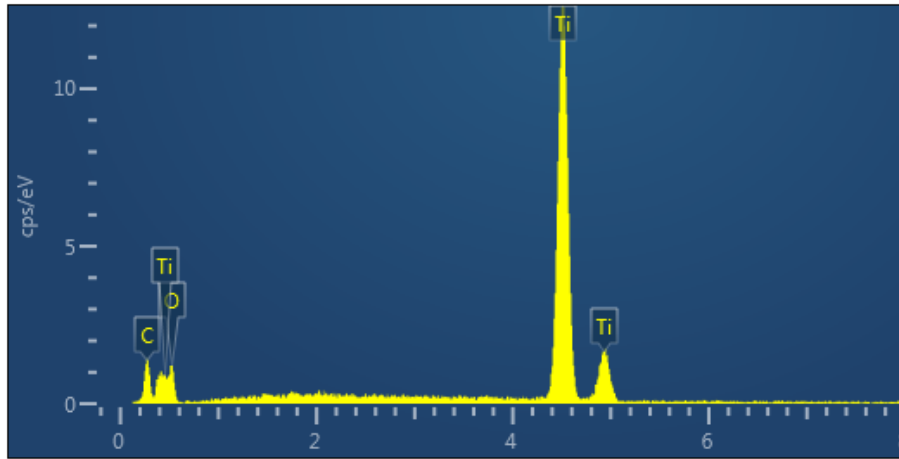

**Figure S2.** EDS result of the  $\text{TiO}_2$ -C peapods array scarped from Ti foil.

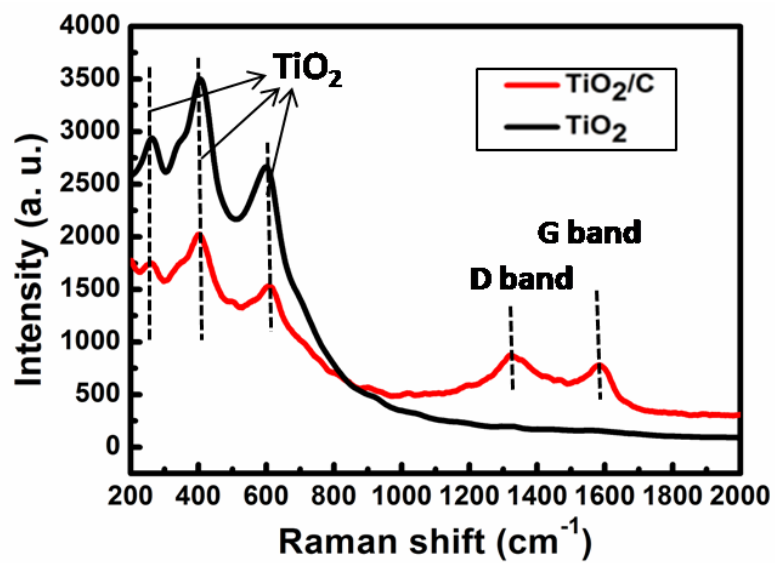

Figure S3. Raman spectra of the as-prepared TiO<sub>2</sub>-C peapods array.

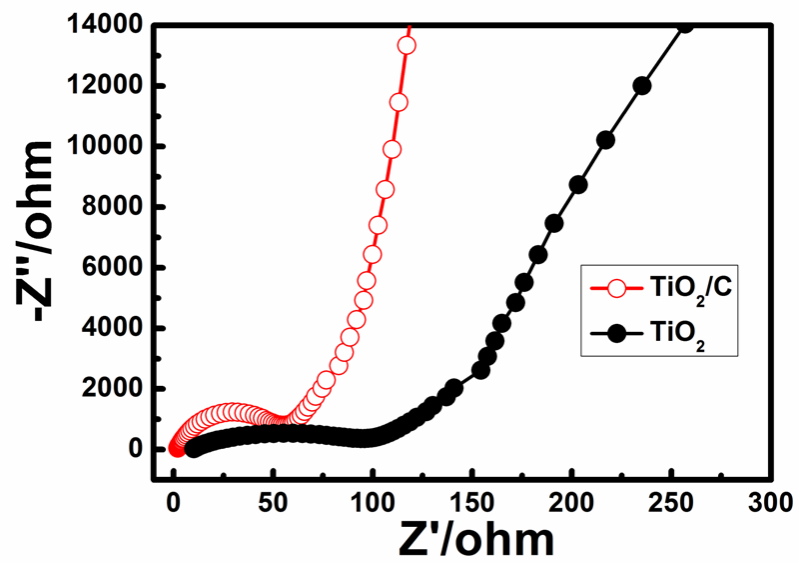

**Figure S4.** Nyquist plots of the  $\text{TiO}_2$  and  $\text{TiO}_2\text{-C}$  peapods arrays.

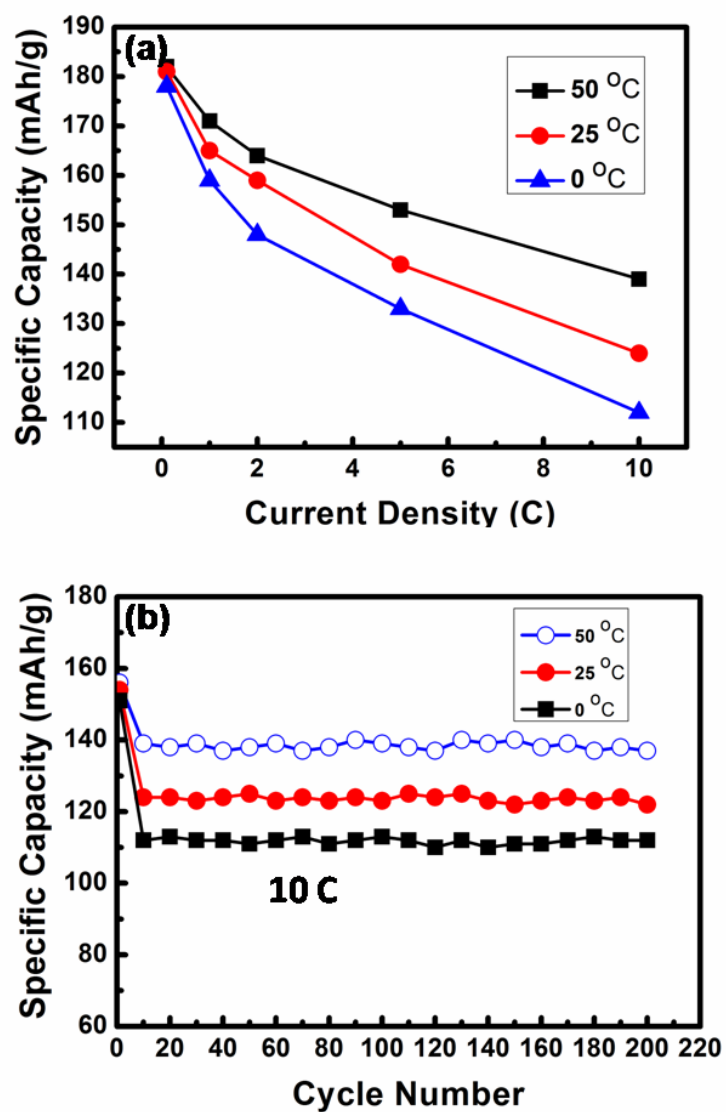

**Figure S5.** (a) is the profile for the stably delivered capacity of the TiO<sub>2</sub>-C peapods array on Ti foil at different temperature, 0, 25, 50°C. (b) is the temperature-dependent galvanostatic result cycled over 200 times at 0, 25, 50 °C.
